# Supplementary material
Source: PubMed Central journal article supplement (PMC7106791)
Supplement: 12931_2020_1340_MOESM1_ESM.pdf [file 12931_2020_1340_MOESM1_ESM.pdf]

Supplementary Table 1 – Sputum collection characteristics by COPD disease state, association with treatment and viral detection

| Sample characteristics*                                   | Europe (n=669) | USA (n=510) | P-value       |
|-----------------------------------------------------------|----------------|-------------|---------------|
| <b>Disease state</b>                                      |                |             |               |
| Stable <sup>a</sup>                                       | 290 (43.3%)    | 157 (30.8%) | <b>1.E-05</b> |
| Acute exacerbation <sup>b</sup>                           | 223 (33.3%)    | 173 (33.9%) | 0.8           |
| Exacerbation follow-up <sup>c</sup>                       | 156 (23.3%)    | 180 (35.3%) | <b>6.E-06</b> |
| <b>Treatment at time of sample collection<sup>d</sup></b> |                |             |               |
| Antibiotics                                               | 20 (3%)        | 98 (19.2%)  | <b>3.E-20</b> |
| Inhaled corticosteroids                                   | 121 (18.1%)    | 68 (13.9%)  | 0.06          |
| <b>Viral detection<sup>e</sup></b>                        |                |             |               |
| Any virus                                                 | 167 (25%)      | 135 (26.7%) | 0.6           |
| Adenovirus                                                | 8 (1.2%)       | 1 (0.2%)    | 0.05          |
| Adenovirus BE                                             | 2 (0.3%)       | 0 (0%)      | 0.2           |
| Adenovirus C                                              | 6 (0.9%)       | 1 (0.2%)    | 0.1           |
| Coronavirus                                               | 30 (4.5%)      | 30 (5.9%)   | 0.3           |
| Coronavirus 229E                                          | 8 (1.2%)       | 7 (1.4%)    | 0.8           |
| Coronavirus HKU1                                          | 6 (0.9%)       | 14 (2.7%)   | <b>0.01</b>   |
| Coronavirus NL63                                          | 7 (1.0%)       | 3 (0.6%)    | 0.4           |
| Coronavirus OC43                                          | 10 (1.5%)      | 11 (2.2%)   | 0.4           |
| Human Metapneumovirus                                     | 9 (1.4%)       | 6 (1.2%)    | 0.8           |
| Human Rhinovirus (HRV)                                    | 88 (13.3%)     | 72 (14.5%)  | 0.5           |
| HRV A                                                     | 20 (3%)        | 22 (4.3%)   | 0.2           |
| HRV B                                                     | 6 (0.9%)       | 7 (1.4%)    | 0.4           |
| HRV C                                                     | 16 (2.4%)      | 7 (1.4%)    | 0.2           |
| Influenza virus                                           | 29 (4.3%)      | 14 (2.7%)   | 0.1           |
| Influenza virus A                                         | 13 (1.9%)      | 11 (2.2%)   | 0.8           |
| Influenza virus A H1                                      | 5 (0.7%)       | 5 (1.0%)    | 0.7           |
| Influenza virus A H3                                      | 7 (1.0%)       | 6 (1.2%)    | 0.8           |
| Influenza virus B                                         | 16 (2%)        | 3 (0.6%)    | <b>0.02</b>   |
| Parainfluenza virus (PIV)                                 | 11 (1.6%)      | 11 (2.2%)   | 0.5           |
| PIV 1                                                     | 0 (0%)         | 2 (0.4%)    | 0.1           |
| PIV 2                                                     | 1 (0.1%)       | 3 (0.6%)    | 0.2           |
| PIV 3                                                     | 3 (0.4%)       | 5 (1.0%)    | 0.3           |
| PIV 4                                                     | 7 (1.0%)       | 1 (0.2%)    | 0.08          |
| Respiratory Syncytial virus (RSV)                         | 13 (1.9%)      | 16 (3.3%)   | 0.2           |
| RSV A                                                     | 2 (0.3%)       | 7 (1.4%)    | <b>0.04</b>   |
| RSV B                                                     | 4 (0.6%)       | 7 (1.4%)    | 0.2           |

\* Categorical data presented as number (proportion)

a Baseline or >1month following exacerbation event

b Within 3 days of exacerbation onset

c Three days to 1 month following exacerbation event

d Sample collected 1 to 7 days following treatment

e Genmark Respiratory viral panel and in-house RT-PCR (see Methods)

Supplementary Table 2 - Statistical significance of Alpha and Beta microbiome diversity metrics against demographic and clinical variables using Qiime2's diversity plugin

|                                      | Alpha diversity <sup>a</sup> |         |          | Beta diversity <sup>b</sup> |                    |                  |
|--------------------------------------|------------------------------|---------|----------|-----------------------------|--------------------|------------------|
|                                      | observed OTUs                | Shannon | Evenness | Faith PD                    | Unweighted Unifrac | Weighted Unifrac |
| <b>Demographic</b>                   |                              |         |          |                             |                    |                  |
| USA vs Europe                        | 5.E-16                       | 1.E-27  | 3.E-28   | 4.E-18                      | 1.E-03             | 1.E-03           |
| Sex                                  | 0.07                         | 0.36    | 0.94     | 0.06                        | 1.E-03             | 1.E-03           |
| Smoking Status                       | 0.02                         | 8.E-03  | 0.03     | 1.E-03                      | 1.E-03             | 6.E-03           |
| Pack-years*                          | 1.E-06                       | 9.E-08  | 2.E-05   | 9.E-06                      | 1.E-03             | 1.E-03           |
| Subject ID                           | 7.E-50                       | 1.E-41  | 6.E-28   | 1.E-49                      | 1.E-03             | 1.E-03           |
| <b>Disease severity</b>              |                              |         |          |                             |                    |                  |
| GOLD Stage                           | 3.E-06                       | 9.E-05  | 0.01     | 3.E-05                      | 1.E-03             | 0.02             |
| Years of severe COPD*                | 1.E-04                       | 2.E-07  | 1.E-07   | 3.E-05                      | 1.E-03             | 1.E-03           |
| Exacerbation event                   | 0.14                         | 1.E-02  | 3.E-03   | 0.44                        | 1.E-03             | 1.E-03           |
| Frequent Exacerbation (>=2/year)     | 0.12                         | 0.02    | 0.02     | 0.07                        | 1.E-03             | 1.E-03           |
| <b>Comorbidities</b>                 |                              |         |          |                             |                    |                  |
| Diabetes                             | 0.89                         | 0.60    | 0.18     | 0.51                        | 1.E-03             | 2.E-03           |
| Malignancy                           | 3.E-07                       | 7.E-08  | 5.E-05   | 5.E-08                      | 1.E-03             | 1.E-03           |
| Pulmonary Artery Hypertension        | 0.02                         | 2.E-05  | 1.E-07   | 0.11                        | 1.E-03             | 1.E-03           |
| <b>Most dominant Bacteria</b>        |                              |         |          |                             |                    |                  |
| Escherichia                          | 2.E-05                       | 8.E-05  | 4.E-04   | 2.E-04                      | 1.E-03             | 1.E-03           |
| Haemophilus                          | 1.E-08                       | 1.E-11  | 4.E-12   | 2.E-07                      | 1.E-03             | 1.E-03           |
| Lactobacillus                        | 0.19                         | 0.18    | 0.68     | 0.09                        | 2.E-03             | 1.E-03           |
| Moraxella                            | 0.9                          | 0.02    | 2.E-05   | 0.98                        | 0.17               | 1.E-03           |
| Neisseria                            | 0.44                         | 0.59    | 0.75     | 0.53                        | 2.E-03             | 1.E-03           |
| Other                                | 3.E-04                       | 7.E-05  | 6.E-05   | 0.01                        | 1.E-03             | 1.E-03           |
| Prevotella                           | 3.E-27                       | 1.E-47  | 1.E-50   | 1.E-23                      | 1.E-03             | 1.E-03           |
| Pseudomonas                          | 4.E-07                       | 1.E-08  | 8.E-09   | 3.E-05                      | 1.E-03             | 1.E-03           |
| Streptococcus                        | 1.E-03                       | 2.E-08  | 1.E-08   | 3.E-03                      | 1.E-03             | 1.E-03           |
| Veillonella                          | 0.25                         | 0.19    | 0.08     | 0.11                        | 1.E-03             | 1.E-03           |
| <b>Viral infection</b>               |                              |         |          |                             |                    |                  |
| Any virus                            | 0.82                         | 0.48    | 0.16     | 0.98                        | 0.16               | 0.08             |
| Adenovirus                           | 0.39                         | 0.56    | 0.91     | 0.27                        | 0.45               | 0.92             |
| Coronavirus                          | 0.15                         | 0.35    | 0.41     | 0.08                        | 0.16               | 0.25             |
| HMPV                                 | 0.86                         | 0.73    | 0.46     | 0.82                        | 0.50               | 0.04             |
| HRV                                  | 0.42                         | 0.99    | 0.57     | 0.25                        | 0.31               | 0.23             |
| Influenza                            | 0.13                         | 0.04    | 0.06     | 0.14                        | 0.05               | 0.22             |
| PIV                                  | 0.82                         | 0.48    | 0.22     | 0.72                        | 0.09               | 0.03             |
| RSV                                  | 0.12                         | 0.02    | 0.01     | 0.24                        | 0.17               | 0.01             |
| Frequent Viral Infections (>=2/year) | 0.64                         | 0.30    | 0.29     | 0.86                        | 1.E-03             | 0.01             |
| <b>Treatment</b>                     |                              |         |          |                             |                    |                  |
| Antibiotics                          | 0.03                         | 3.E-03  | 4.E-04   | 0.07                        | 1.E-03             | 1.E-03           |
| Inhaled Corticosteroids              | 3.E-03                       | 9.E-03  | 0.04     | 2.E-03                      | 1.E-03             | 4.E-03           |

\*top vs bottom quartile

<sup>a</sup>Alpha diversity significance calculated as FDR-corrected P-value from grouped and pairwise Kruskal-Wallis test for analysis of diversity corrected for false discovery rate.

<sup>b</sup>Beta diversity significance calculated as FDR-corrected P-values using PERMANOVA following 999 permutations

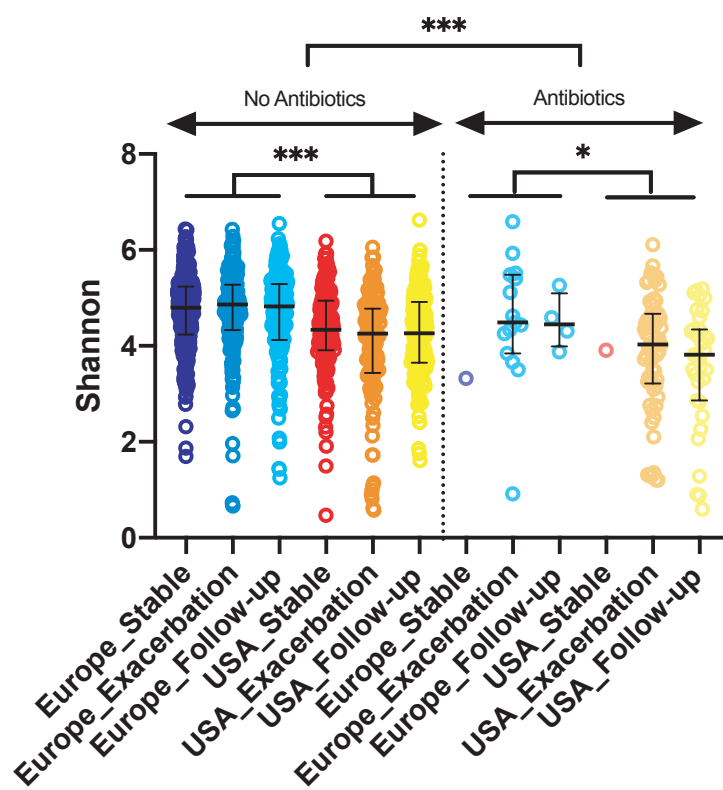

**Supplementary Figure 1** – Shannon diversity following antibiotic treatment in Europe and USA patients. \*  $P < 0.05$ , \*\*\*  $P < 0.0001$

A)

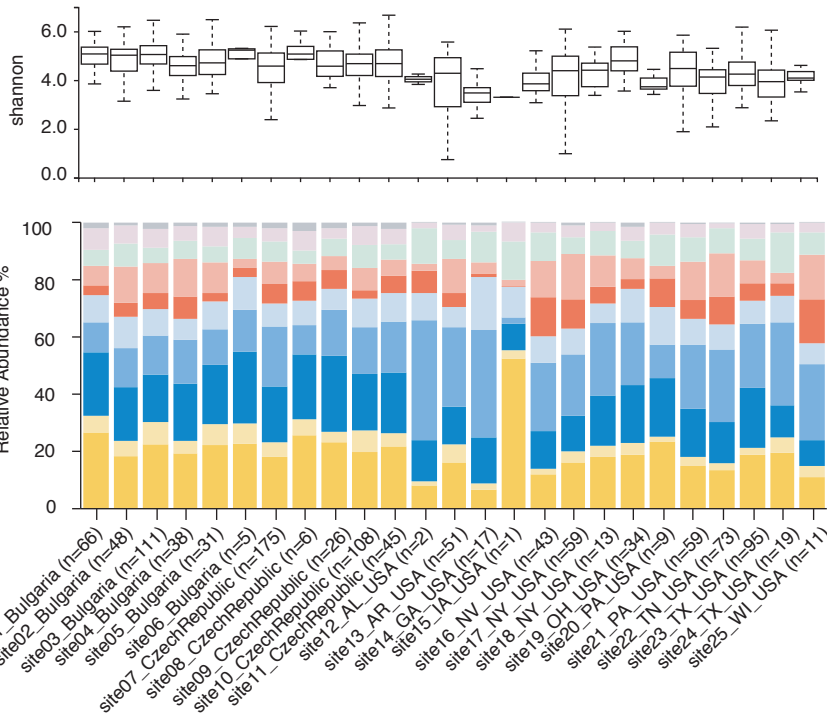

- Taxa
- Others
  - Fusobacteria
  - Actinobacteria
  - Proteobacteria (Others)
  - Proteobacteria (Haemophilus)
  - Firmicutes (Others)
  - Firmicutes (Streptococcus)
  - Firmicutes (Veillonella)
  - Bacteroidetes (Others)
  - Bacteroidetes (Prevotella)

B)

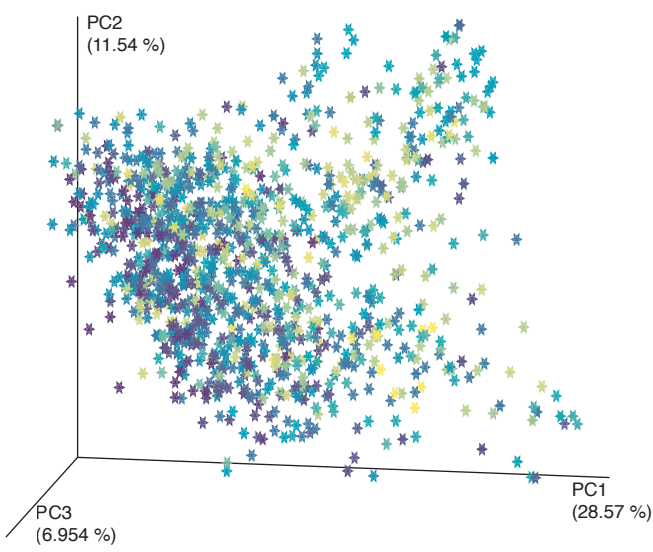

- Site location
- site01\_Bulgaria
  - site02\_Bulgaria
  - site03\_Bulgaria
  - site04\_Bulgaria
  - site05\_Bulgaria
  - site06\_Bulgaria
  - site07\_CzechRepublic
  - site08\_CzechRepublic
  - site09\_CzechRepublic
  - site10\_CzechRepublic
  - site11\_CzechRepublic
  - site12\_AL\_USA
  - site13\_AR\_USA
  - site14\_GA\_USA
  - site15\_IA\_USA
  - site16\_NV\_USA
  - site17\_NY\_USA
  - site18\_NY\_USA
  - site19\_OH\_USA
  - site20\_PA\_USA
  - site21\_PA\_USA
  - site22\_TN\_USA
  - site23\_TX\_USA
  - site24\_TX\_USA
  - site25\_WI\_USA

**Supplementary Figure 2 – Microbiome composition and diversity across study sites.** (A) Taxonomic barplot of major bacterial phyla and genera in samples grouped by geography and disease state, and their respective Shannon diversity index represented as boxplots with interquartile range whiskers. (B) Principal coordinate analysis of weighted Unifrac distances of the sputum microbiomes colored by sites

**A)**

Geography and Sample type

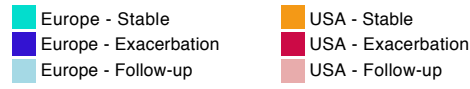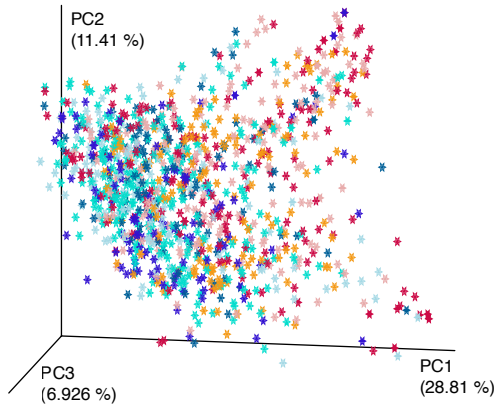

**B)**

Most dominant bacterial taxa

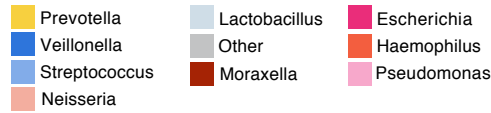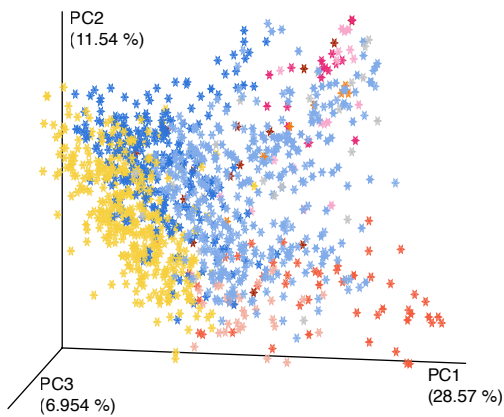

**C)**

Viral infection

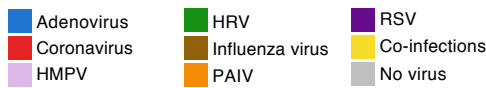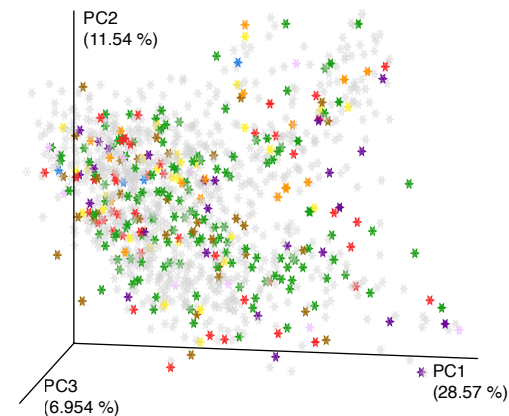

**Supplementary Figure 3** – Principal coordinate analysis of weighted Unifrac distances of the sputum microbiomes colored by (A) geography and sample type, (B) most predominant bacterial taxa, and (C) viral infection

### A) Stable vs Acute exacerbation samples

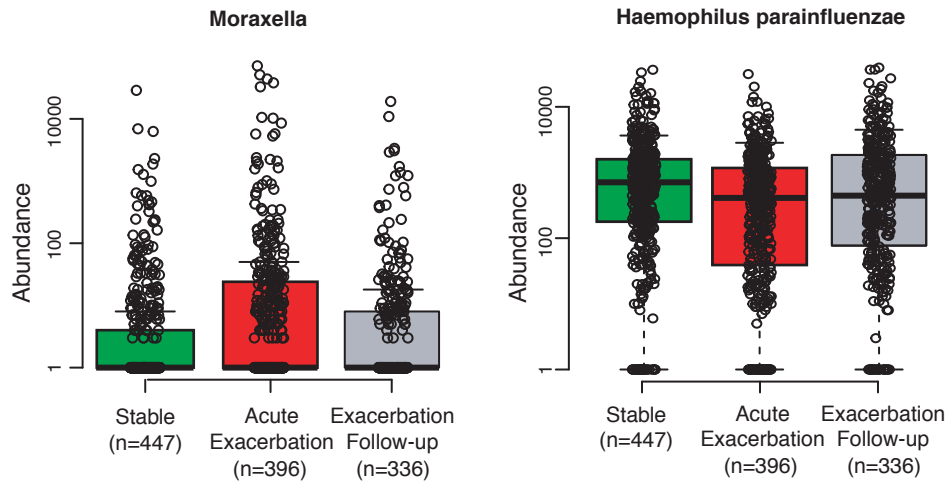

### B) Frequent ( $\geq 2/y$ ) vs Infrequent ( $< 2/y$ ) exacerbations

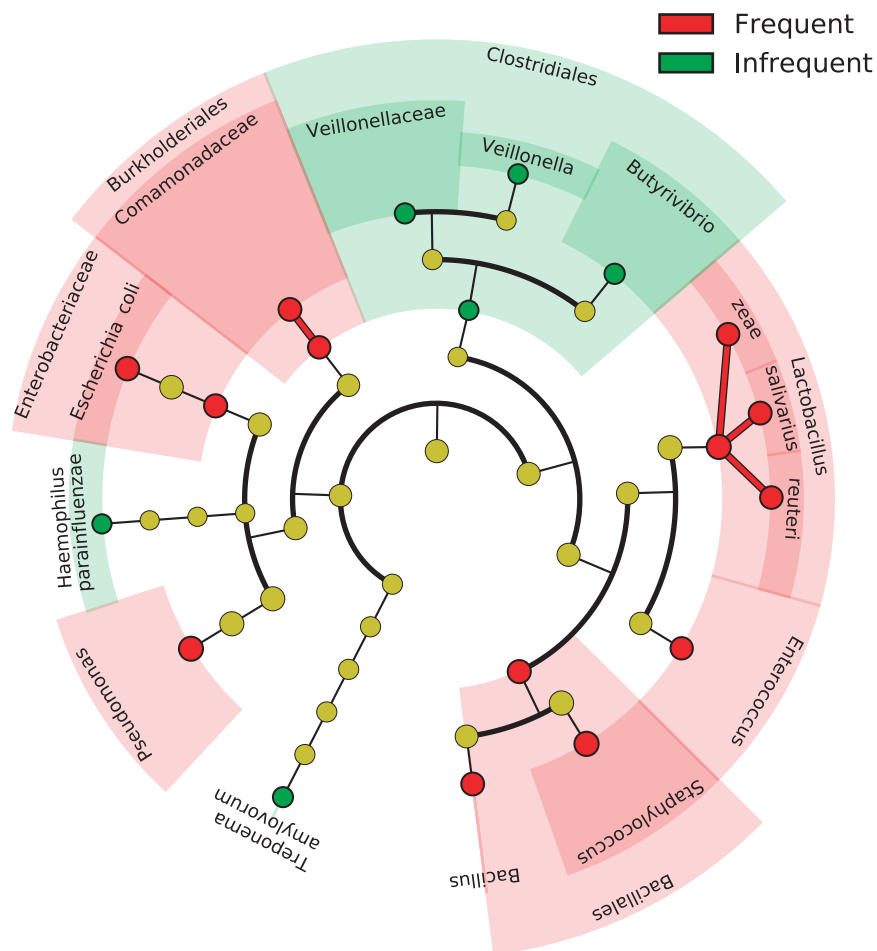

**Supplementary Figure 4** – Bacteria associated with COPD exacerbation or frequency of exacerbation. (A) Abundance of *Moraxella* and *H.parainfluenzae* identified by analysis of composition (ANCOM) of microbiomes between stable and acute exacerbation samples. (B) Cladogram of bacterial taxa identified by ANCOM comparing Frequent ( $\geq 2$  exacerbation event/ year) to Infrequent exacerbator

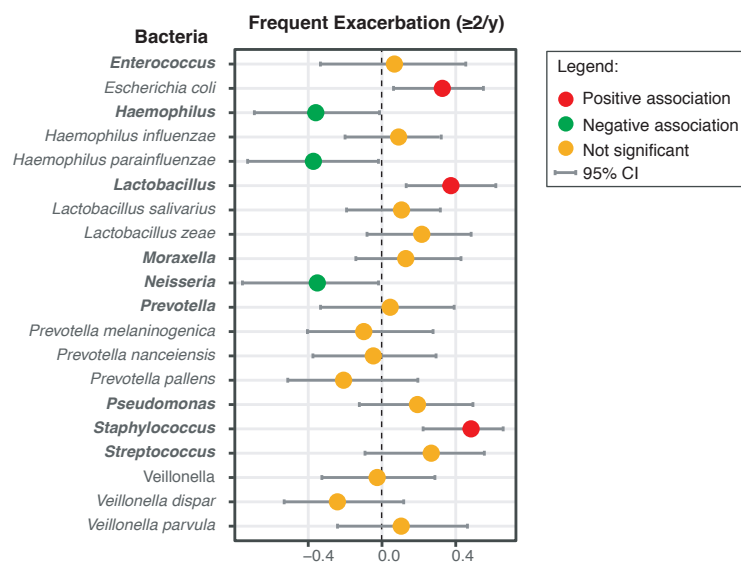

**Supplementary Figure 5** – Adjusted odds ratio of bacterial abundance (top/bottom quartile) in stable samples only to be associated with frequent exacerbations.

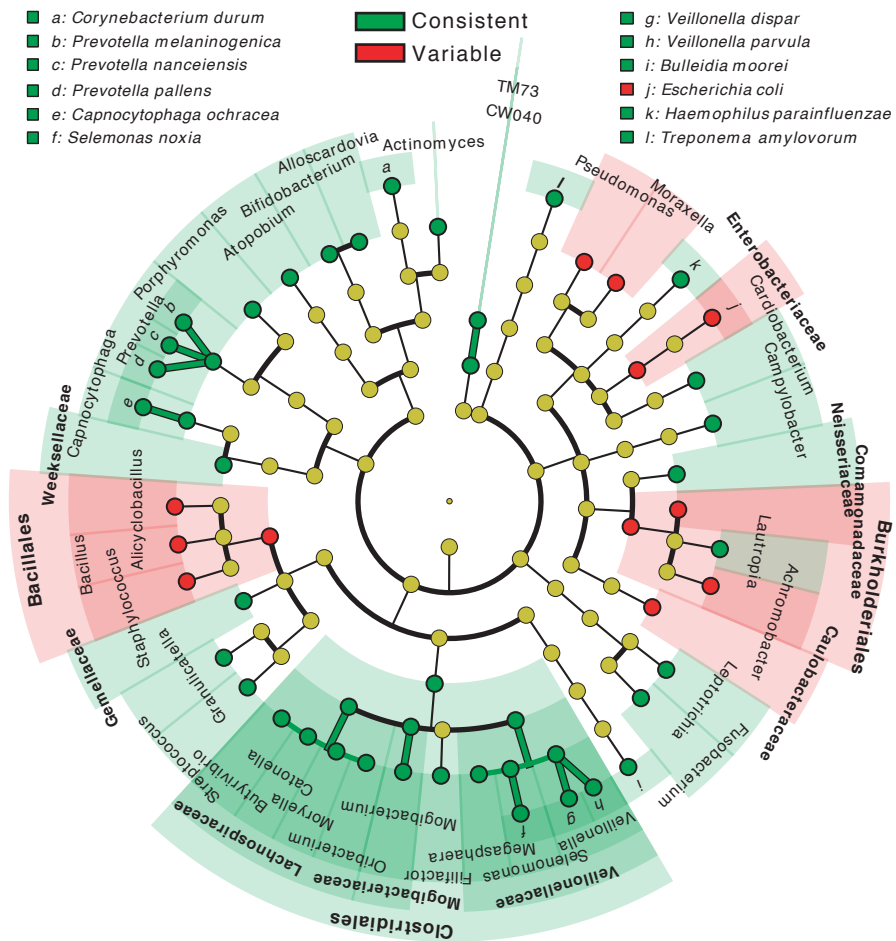

**Supplementary Figure 6** – Cladogram of 55 Differentially abundant bacterial taxa identified by ANCOM comparing consistent to variable longitudinal microbiome patient profiles at stable state
